# Supplementary material for: Phylogeography of the marine benthic alga Gracilaria salicornia (Gracilariales, Rhodophyta) in Southeast Asia
Source: publisher site journal article supplement (doi:10.1515/bot-2024-0099), 2025-04-17
Supplement: Supplementary file 2 [file j_bot-2024-0099_suppl_001.docx]

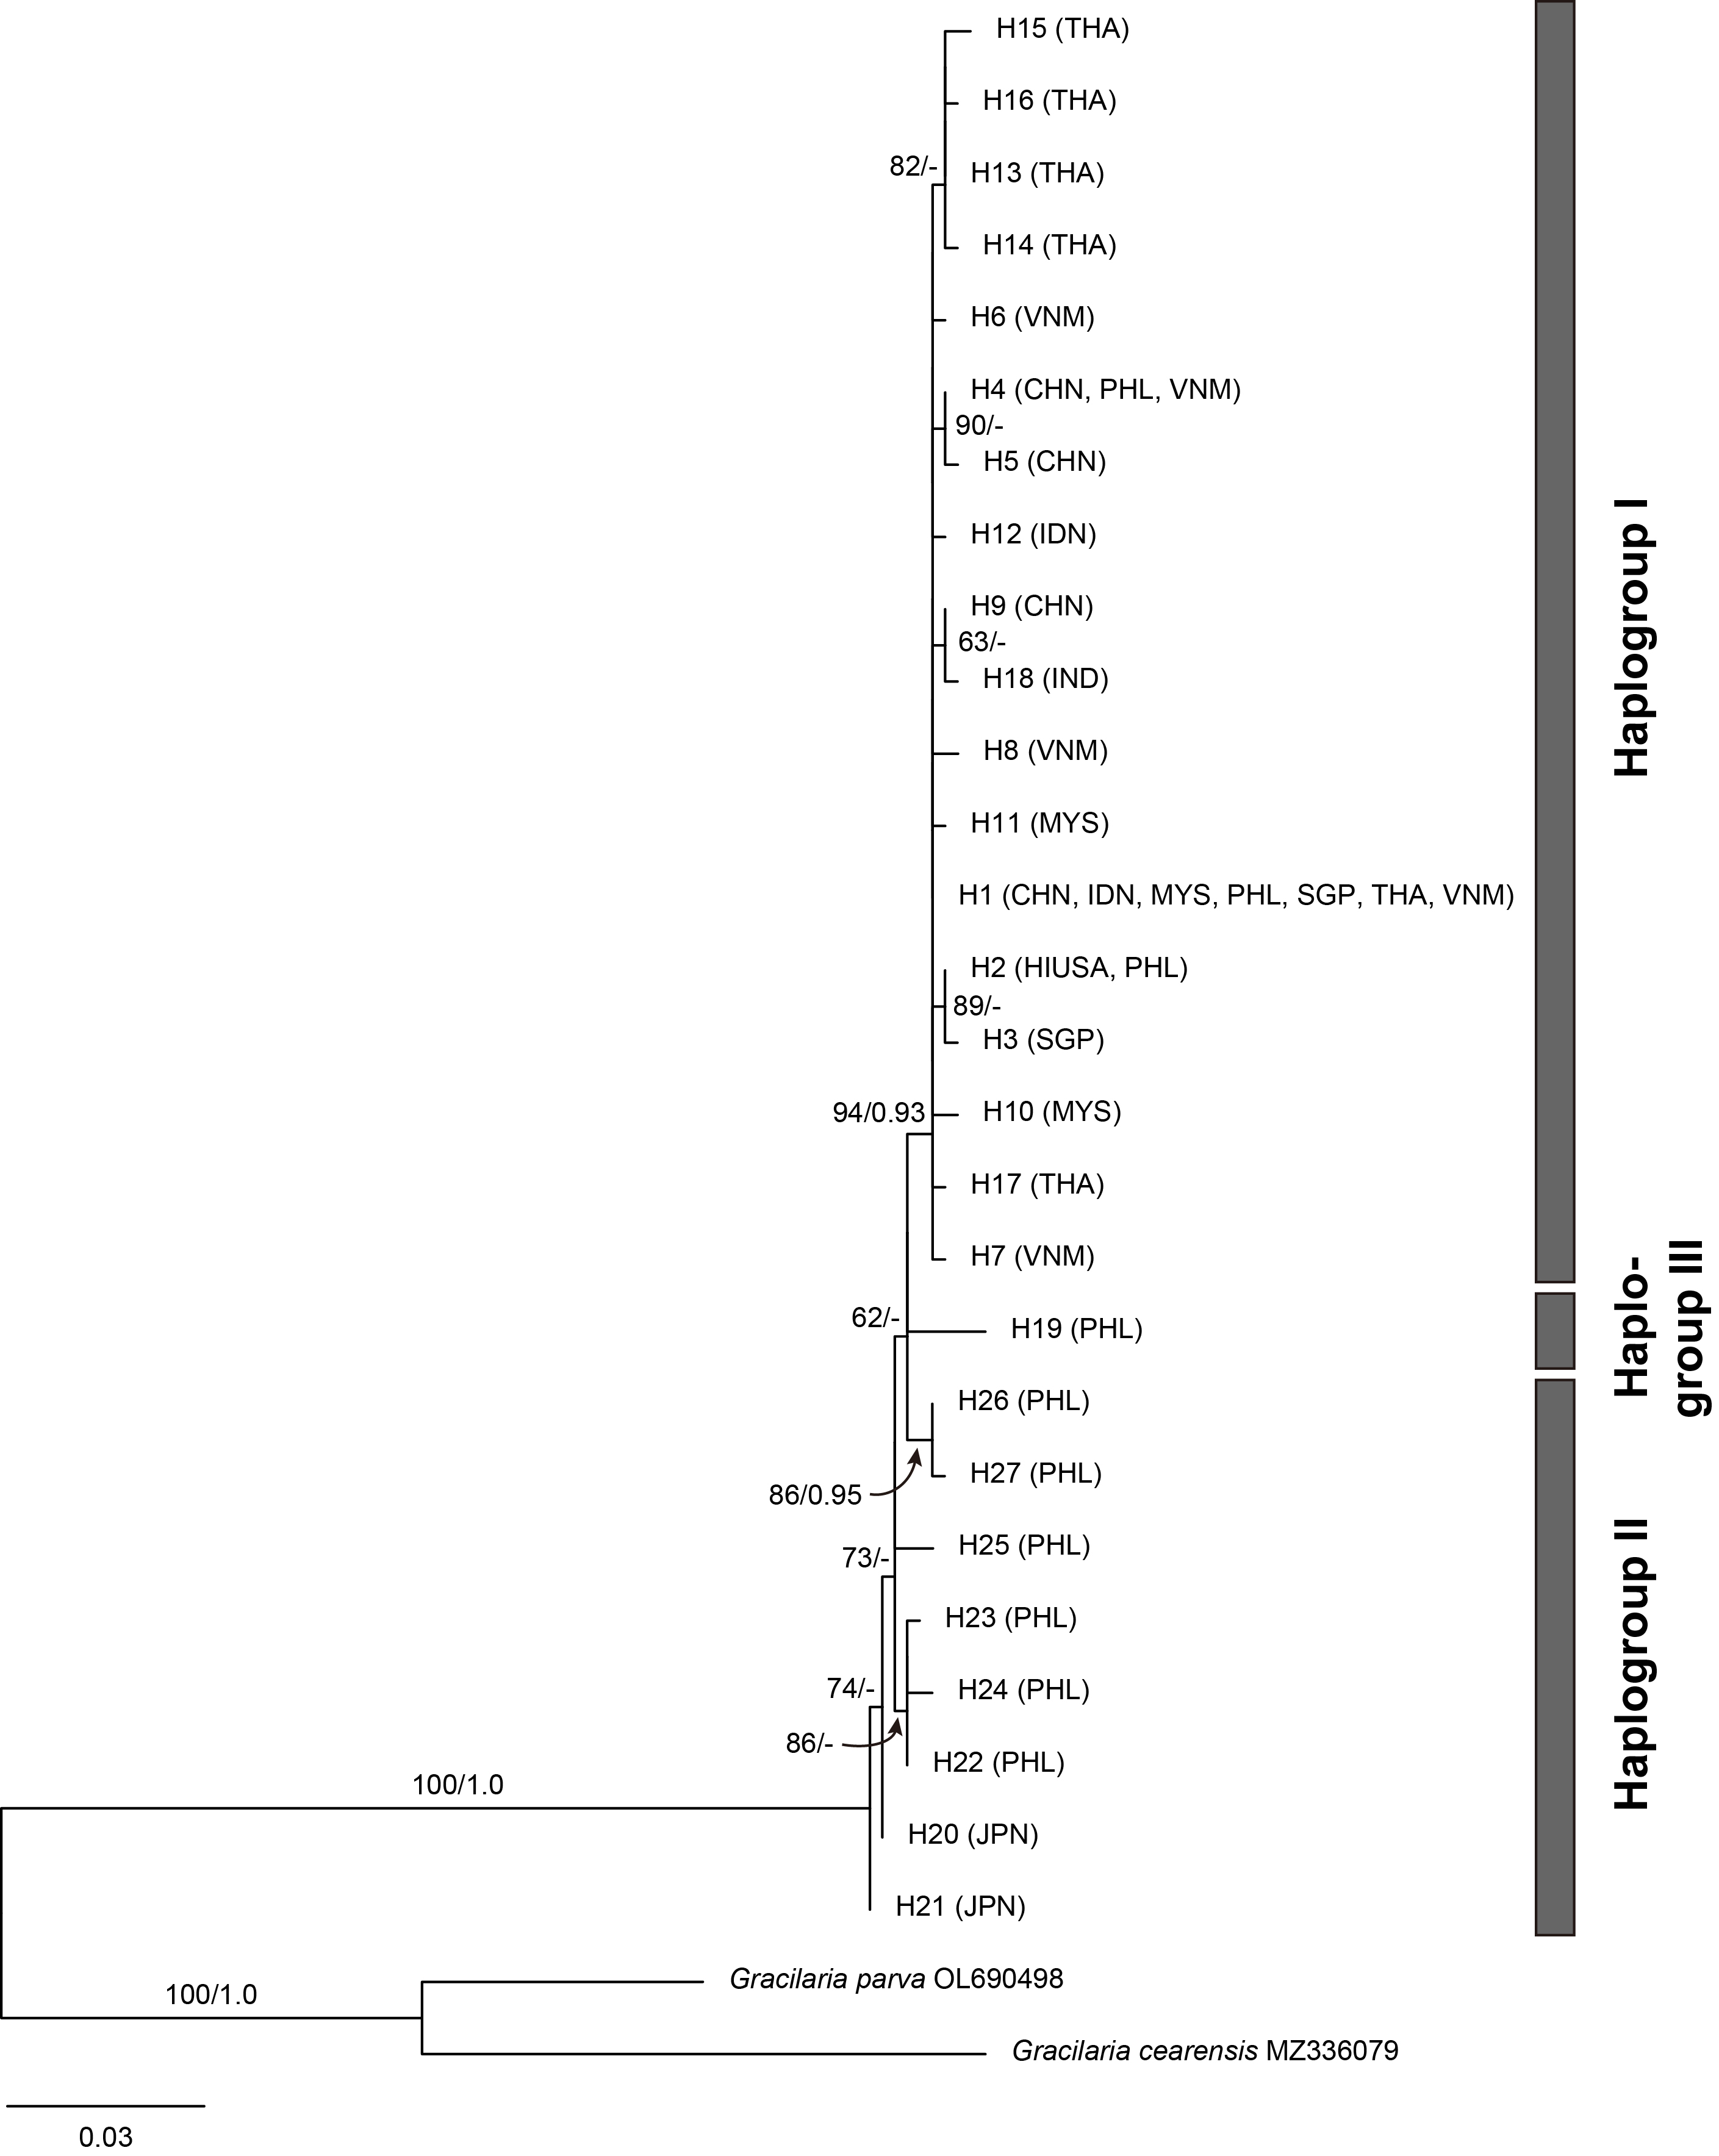


**Supplementary Figure S1:** Maximum likelihood (ML) phylogeny of *Gracilaria salicornia* using mitochondrial COI-5P sequences. ML bootstrap values (≥50%) and Bayesian posterior probabilities (≥0.9) are shown at branches.
