# Supplementary material for: Phylogeography of the marine benthic alga Gracilaria salicornia (Gracilariales, Rhodophyta) in Southeast Asia
Source: publisher site journal article supplement (doi:10.1515/bot-2024-0099), 2025-04-17
Supplement: Supplementary file 3 [file j_bot-2024-0099_suppl_002.xlsx]

## Sheet: Sheet1
Supplementary Table S1: Collection information, haplotype codes, and GenBank accession numbers of specimens used in this study. Bold numbers indicate sequences generated in this study. Dash indicates not known.
Species	Voucher-code	Collection site	Collection date	cox1	Country	Haplotype	Reference
Gracilaria salicornia	SY6-1	Haitang Bay, Sanya City, Hainan Province, China	2015.03.16	OP669438	China	H1	Wang et al. 2023
Gracilaria salicornia	SY6-2	Haitang Bay, Sanya City, Hainan Province, China	2015.03.16	OP669439	China	H9	Wang et al. 2023									Supplementary Material
Gracilaria salicornia	ZJ3-2	Liusha Bay, Zhanjiang City, Guangdong Province, China	2015.06	OP669452	China	H1	Wang et al. 2023									Phylogeography of the marine benthic alga Gracilaria salicornia (Gracilariales, Rhodophyta) in Southeast Asia
Gracilaria salicornia	ZJ3-3	Liusha Bay, Zhanjiang City, Guangdong Province, China	2015.06	OP669453	China	H1	Wang et al. 2023									Tu Van Nguyen and Ga Hun Boo
Gracilaria salicornia	WC71	Tongguling, Wenchang City, Hainan Province, China	2020.01.05	OP669443	China	H1	Wang et al. 2023									DOI 10.1515/bot-2024-0099
Gracilaria salicornia	G056	Xiaodonghai Bay, Sanya, Hainan, China	2010.01.30	JN790237	China	H1	Yang et al. 2013
Gracilaria salicornia	SY65	Xiaodonghai, Sanya City, Hainan Province, China	2017.06.21	OP669440	China	H1	Wang et al. 2023
Gracilaria salicornia	SY111	Xiaodonghai, Sanya City, Hainan Province, China	2019.08.31	OP669442	China	H1	Wang et al. 2023
Gracilaria salicornia	SY66	Xiaodonghai, Sanya City, Hainan Province, China	2018.04.29	OP669441	China	H5	Wang et al. 2023
Gracilaria salicornia	YGH15-1	Yinggehai Town, Ledong County, Hainan Province, China	2017.03.28	OP669447	China	H1	Wang et al. 2023
Gracilaria salicornia	YGH63	Yinggehai Town, Ledong County, Hainan Province, China	2018.04.30	OP669449	China	H1	Wang et al. 2023
Gracilaria salicornia	YGH123	Yinggehai Town, Ledong County, Hainan Province, China	2019.08.28	OP669450	China	H1	Wang et al. 2023
Gracilaria salicornia	YGH202	Yinggehai Town, Ledong County, Hainan Province, China	2021.04.12	OP669451	China	H1	Wang et al. 2023
Gracilaria salicornia	YGH45	Yinggehai Town, Ledong County, Hainan Province, China	2017.06.22	OP669448	China	H4	Wang et al. 2023
Gracilaria salicornia	XS108	Yongxing Island, Xisha Islands, Sansha City, Hainan Province, China	2021.10.03	OP669444	China	H1	Wang et al. 2023
Gracilaria salicornia	XS126	Yongxing Island, Xisha Islands, Sansha City, Hainan Province, China	2021.10.05	OP669445	China	H1	Wang et al. 2023
Gracilaria salicornia	XS138	Yongxing Island, Xisha Islands, Sansha City, Hainan Province, China	2021.10.09	OP669446	China	H1	Wang et al. 2023
Gracilaria salicornia	ARS03200	Hawaii, USA	-	HQ422810	HI, USA	H2	Sherwood et al. 2010
Gracilaria salicornia	ARS03201	Hawaii, USA	-	HQ422811	HI, USA	H2	Sherwood et al. 2010
Gracilaria salicornia	ARS03023	Hawaii, USA	-	HQ422859	HI, USA	H2	Sherwood et al. 2010
Gracilaria salicornia	ARS00157	Hawaii, USA	-	HQ422875	HI, USA	H2	Sherwood et al. 2010
Gracilaria salicornia	ARS02207	Hawaii, USA	-	HQ422940	HI, USA	H2	Sherwood et al. 2010
Gracilaria salicornia	ARS03579	Hawaii, USA	-	HQ423011	HI, USA	H2	Sherwood et al. 2010
Gracilaria salicornia	ARS03952	Hawaii, USA	-	HQ423015	HI, USA	H2	Sherwood et al. 2010
Gracilaria salicornia	ARS08332	Tonggs Beach, Honolulu, Hawaii, USA	2012.07.17	KF824534	HI, USA	H2	Campbell et al. 2014
Gracilaria salicornia	CUPVOUCHER-Grsa-2020-1	Thondi, Tamil Nadu, India	2018.10.30	MT939890	India	H18	Kundu 2022 (Doctoral thesis)
Gracilaria salicornia	PSM 12273_UMSS 0337	Batukijok, Lombok, Indonesia	2010.10.07	MH028766	Indonesia	H1	Ng et al. unpublished.
Gracilaria salicornia	PSM 12271_UMSS 0335	Giligenting, Lombok, Indonesia	2010.10.06	MH028765	Indonesia	H1	Ng et al. unpublished.
Gracilaria salicornia	PSM 12288_UMSS 0700	Pandawa Beach, Bali, Indonesia	2013.05.24	MH028767	Indonesia	H12	Ng et al. unpublished.
Gracilaria salicornia	PSM 12276	Bise, Motubu, Okinawa, Japan	2010.07.10	KC209005	Japan	H21	Ng et al. 2014
Gracilaria salicornia	PSM 12276_UMSS 0352	Bise, Motubu, Okinawa, Japan	2010.07.10	KC208994	Japan	H21	Ng et al. 2015a
Gracilaria salicornia	PSM 12276_UMSS 0351	Bise, Motubu, Okinawa, Japan	2010.07.10	JQ694687	Japan	H21	Ng et al. unpublished.
Gracilaria salicornia	G361	Ikei Island Uruma, Okinawa, Japan	2010.03.03	JN790234	Japan	H20	Yang et al. 2013
Gracilaria salicornia	YG010	Ikei Island Uruma, Okinawa, Japan	2010.03.03	JN790236	Japan	H20	Yang et al. 2013
Gracilaria salicornia	PSM 12275_UMSS 0344	Batu Besar, Melaka, Malaysia	2010.06.28	KC208996	Malaysia	H1	Ng et al. 2015a
Gracilaria salicornia	PSM 12275_UMSS 0345	Batu Besar, Melaka, Malaysia	2010.06.28	JQ694680	Malaysia	H1	Ng et al. unpublished.
Gracilaria salicornia	G172	Batu Feringgi, Penang, Malaysia	2007.12.12	JN790222	Malaysia	H1	Yang et al. 2013
Gracilaria salicornia	G177	Batu Feringgi, Penang, Malaysia	2007.12.12	JN790201	Malaysia	H11	Yang et al. 2013
Gracilaria salicornia	PSM 12257_UMSS 0286	Morib, Selangor, Malaysia	2009.05.25	JQ694673	Malaysia	H1	Ng et al. 2015a
Gracilaria salicornia	PSM 12257_UMSS 0289	Morib, Selangor, Malaysia	2009.05.25	KP010027	Malaysia	H1	Ng et al. 2015a
Gracilaria salicornia	G169	Morib, Selangor, Malaysia	2007.11.23	JN790224	Malaysia	H1	Yang et al. 2013
Gracilaria salicornia	PSM 12267_UMSS 0321	Pantai Dickson, Negeri Sembilan, Malaysia	2009.12.16	KP010028	Malaysia	H1	Ng et al. 2015a
Gracilaria salicornia	PSM 12267_UMSS 0324	Pantai Dickson, Negeri Sembilan, Malaysia	2009.12.16	JQ694679	Malaysia	H1	Ng et al. 2015a
Gracilaria salicornia	GS1	Pantai Dickson, Negeri Sembilan, Malaysia	2015.04.06	KT373903	Malaysia	H1	Song et al. 2016
Gracilaria salicornia	PSM 12486_UMSS 0656	Pantau-Pantau, Sabah, Malaysia	2012.07.05	KP010039	Malaysia	H1	Ng et al. 2015a
Gracilaria salicornia	PSM 12487_UMSS 0657	Pantau-Pantau, Sabah, Malaysia	2012.07.05	KP010040	Malaysia	H10	Ng et al. 2015a
Gracilaria salicornia	PSM 12266_UMSS 0320	Port Dickson, Negeri Sembilan, Malaysia	2009.12.16	JQ694681	Malaysia	H1	Ng et al. 2015a
Gracilaria salicornia	PSM 12268_UMSS 0327	Pulau Besar, Melaka, Malaysia	2009.10.29	KP010030	Malaysia	H1	Ng et al. 2015a
Gracilaria salicornia	PSM 12268_UMSS 0328	Pulau Besar, Melaka, Malaysia	2009.10.29	JQ694676	Malaysia	H1	Ng et al. 2015a
Gracilaria salicornia	PSM 12482_UMSS 0635	Pulau Che Kamat, Johor, Malaysia	2012.03.16	KC209001	Malaysia	H1	Ng et al. 2015a
Gracilaria salicornia	PSM 12482_UMSS 0636	Pulau Che Kamat, Johor, Malaysia	2012.03.16	KP010032	Malaysia	H1	Ng et al. 2015a
Gracilaria salicornia	PSM 12483_UMSS 0641	Pulau Che Kamat, Johor, Malaysia	2012.03.16	KP010033	Malaysia	H1	Ng et al. 2015a
Gracilaria salicornia	PSM 12483_UMSS 0642	Pulau Che Kamat, Johor, Malaysia	2012.03.16	KP010034	Malaysia	H1	Ng et al. 2015a
Gracilaria salicornia	PSM 12485_UMSS 0653	Pulau Karindingan, Sabah, Malaysia	2012.07.03	KP010038	Malaysia	H10	Ng et al. 2015a
Gracilaria salicornia	PSM 12485_UMSS 0655	Pulau Karindingan, Sabah, Malaysia	2012.07.03	KP010036	Malaysia	H10	Ng et al. 2015a
Gracilaria salicornia	PSM 12485_UMSS 0654	Pulau Karindingan, Sabah, Malaysia	2012.07.03	KP010037	Malaysia	H10	Ng et al. 2015a
Gracilaria salicornia	PSM 12264_UMSS 0310	Pulau Merambong, Johor, Malaysia	2009.08.24	KP010031	Malaysia	H1	Ng et al. 2015a
Gracilaria salicornia	PSM 12264_UMSS 0314	Pulau Merambong, Johor, Malaysia	2009.08.24	JQ694677	Malaysia	H1	Ng et al. 2015a
Gracilaria salicornia	PSM 12742_UMSS 0681	Salakan, Sabah, Malaysia	2013.02.24	KP010041	Malaysia	H10	Ng et al. 2015a
Gracilaria salicornia	PSM 12743	Salakan, Sabah, Malaysia	2013.02.24	KP010042	Malaysia	H10	Ng et al. 2015a
Gracilaria salicornia	PSM 12489_UMSS 0661	Teluk Pelanduk, Negeri Sembilan, Malaysia	2012.07.30	KC209003	Malaysia	H1	Ng et al. 2015a
Gracilaria salicornia	PSM 12489_UMSS 0666	Teluk Pelanduk, Negeri Sembilan, Malaysia	2012.07.30	KP010029	Malaysia	H1	Ng et al. 2015a
Gracilaria salicornia	PSM 12480_UMSS 0626	Teluk Ramunia, Johor, Malaysia	2012.03.15	KP010035	Malaysia	H1	Ng et al. 2015a
Gracilaria salicornia	PSM 12481_UMSS 0632	Teluk Ramunia, Johor, Malaysia	2012.03.15	KC209002	Malaysia	H1	Ng et al. 2015a
Gracilaria salicornia	PSM 12479_UMSS 0625	Teluk Sari, Johor, Malaysia	2012.03.13	KC208997	Malaysia	H1	Ng et al. 2015a
Gracilaria salicornia	G413	Alaminos, Pangasinan, Philippines	2010.04.27	JN790213	Philippines	H27	Yang et al. 2013
Gracilaria salicornia	ABS1	Almeida, Balaoan, La Union, Philippines	2015.03.18	KT357380	Philippines	H27	Ferrer et al. 2019
Gracilaria salicornia	AZS1	ArenaBlanco, Zamboanga City, Philippines	2016.08.24	KY774579	Philippines	H27	Ferrer et al. 2019
Gracilaria salicornia	AZS2	ArenaBlanco, Zamboanga City, Philippines	2016.08.24	KY774580	Philippines	H27	Ferrer et al. 2019
Gracilaria salicornia	AZS3	ArenaBlanco, Zamboanga City, Philippines	2016.08.24	KY774581	Philippines	H27	Ferrer et al. 2019
Gracilaria salicornia	G409	Bantayan, Bantayan Island, Philippines	2010.04.02	JN790232	Philippines	H22	Yang et al. 2013
Gracilaria salicornia	G414	Bantayan, Bantayan Island, Philippines	2010.04.02	JN790230	Philippines	H22	Yang et al. 2013
Gracilaria salicornia	G417	Bantayan, Bantayan Island, Philippines	2010.04.02	JN790229	Philippines	H22	Yang et al. 2013
Gracilaria salicornia	G422	Bantayan, Bantayan Island, Philippines	2010.04.02	JN790228	Philippines	H22	Yang et al. 2013
Gracilaria salicornia	G331	Bantayan, Bantayan Island, Philippines	2010.04.02	JN790219	Philippines	H22	Yang et al. 2013
Gracilaria salicornia	G322	Bantayan, Bantayan Island, Philippines	2010.04.02	JN790196	Philippines	H22	Yang et al. 2013
Gracilaria salicornia	G410	Barangay Bulo, Zamboanga, Philippines	2010.04.10	JN790231	Philippines	H27	Yang et al. 2013
Gracilaria salicornia	G419	Barangay Poblacion, Dumaguete, Philippines	2010.04.30	JN790193	Philippines	H27	Yang et al. 2013
Gracilaria salicornia	PH045	Barangay Pulo, Zamboanga, Philippines	2010.04.10	JN790192	Philippines	H27	Yang et al. 2013
Gracilaria salicornia	BRS1	Barbo, Guiuan, Eastern Samar, Philippines	2015.05.21	KY774599	Philippines	H22	Ferrer et al. 2019
Gracilaria salicornia	BLS1	Barcelona, Sorsogon, Philippines	2015.04.08	KT779916	Philippines	H22	Ferrer et al. 2019
Gracilaria salicornia	BSS2	Bato, Sta .Cruz, Davao del Sur, Philippines	2016.03.08	KY774626	Philippines	H19	Ferrer et al. 2019
Gracilaria salicornia	BSS1	Bato, Sta. Cruz, Davao del Sur, Philippines	2016.03.08	KY774618	Philippines	H26	Ferrer et al. 2019
Gracilaria salicornia	G402	Buenavista, Palawan, Philippines	2010.09.27	JN790233	Philippines	H22	Yang et al. 2013
Gracilaria salicornia	G401	Buenavista, Palawan, Philippines	2010.09.27	JN790198	Philippines	H27	Yang et al. 2013
Gracilaria salicornia	BGS1	Bula, General Santos City, Philippines	2016.08.05	KY774584	Philippines	H27	Ferrer et al. 2019
Gracilaria salicornia	BUS1	Bulanon, Sagay City, Negros Occidental, Philippines	2015.12.05	KY774600	Philippines	H22	Ferrer et al. 2019
Gracilaria salicornia	BUS2	Bulanon, Sagay City, Negros Occidental, Philippines	2015.12.05	KY774585	Philippines	H27	Ferrer et al. 2019
Gracilaria salicornia	G090	Bulusan, Sorsogon, Philippines	2010.02.02	JN790239	Philippines	H22	Yang et al. 2013
Gracilaria salicornia	G407	Bulusan, Sorsogon, Philippines	2010.02.02	JN790216	Philippines	H22	Yang et al. 2013
Gracilaria salicornia	BCS1	Burgos, Cortes, Surigaodel Sur, Philippines	2016.06.03	KY774582	Philippines	H27	Ferrer et al. 2019
Gracilaria salicornia	BCS2	Burgos, Cortes, Surigaodel Sur, Philippines	2016.06.03	KY774583	Philippines	H27	Ferrer et al. 2019
Gracilaria salicornia	GFS1	Campao, Getafe, Bohol, Philippines	2015.06.07	KY774604	Philippines	H22	Ferrer et al. 2019
Gracilaria salicornia	GFS2	Campao, Getafe, Bohol, Philippines	2015.06.07	KY774605	Philippines	H22	Ferrer et al. 2019
Gracilaria salicornia	G403	Caohagan Island, Cebu, Philippines	2010.09.25	JN790217	Philippines	H22	Yang et al. 2013
Gracilaria salicornia	G427	Cawit, Zamboanga, Philippines	2010.09.09	JN790204	Philippines	H27	Yang et al. 2013
Gracilaria salicornia	G426	Cawit, Zamboanga, Philippines	2010.09.09	JN790205	Philippines	H27	Yang et al. 2013
Gracilaria salicornia	G344	Cordova, Cebu, Philippines	2010.03.26	JN790200	Philippines	H22	Yang et al. 2013
Gracilaria salicornia	G424	Cordova, Cebu, Philippines	2010.03.26	JN790227	Philippines	H22	Yang et al. 2013
Gracilaria salicornia	G418	Cordova, Cebu, Philippines	2010.03.26	JN790210	Philippines	H22	Yang et al. 2013
Gracilaria salicornia	G338	Cordova, Cebu, Philippines	2010.03.26	JN790194	Philippines	H22	Yang et al. 2013
Gracilaria salicornia	G337	Cordova, Cebu, Philippines	2010.03.26	JN790195	Philippines	H22	Yang et al. 2013
Gracilaria salicornia	G415	Dalaguete, Cebu, Philippines	2010.04.02	JN790212	Philippines	H22	Yang et al. 2013
Gracilaria salicornia	G416	Dalaguete, Cebu, Philippines	2010.09.03	JN790211	Philippines	H22	Yang et al. 2013
Gracilaria salicornia	DBS1	Dancalan, Bulusan, Sorsogon, Philippines	2015.04.08	KT779915	Philippines	H22	Ferrer et al. 2019
Gracilaria salicornia	G423	Dumaguete, Philippines	2010.04.30	JN790207	Philippines	H27	Yang et al. 2013
Gracilaria salicornia	DSS1	Duyugan, El Salvador, Misamis Oriental, Philippines	2016.02.13	KY774620	Philippines	H24	Ferrer et al. 2019
Gracilaria salicornia	G434	Enrique Villanueva, Siquijor, Philippines	2010.04.29	JN790226	Philippines	H22	Yang et al. 2013
Gracilaria salicornia	EBS1	Estanza, Bolinao, Pangasinan, Philippines	2015.03.20	KT357381	Philippines	H2	Ferrer et al. 2019
Gracilaria salicornia	G430	Hilutungan Island, Cebu, Philippines	2010.01.29	JN790203	Philippines	H27	Yang et al. 2013
Gracilaria salicornia	IBS1	Igang, Bacacay, Albay, Philippines	2016.09.22	KY774606	Philippines	H22	Ferrer et al. 2019
Gracilaria salicornia	IBS2	Igang, Bacacay, Albay, Philippines	2016.09.22	KY774607	Philippines	H22	Ferrer et al. 2019
Gracilaria salicornia	IBS3	Igang, Bacacay, Albay, Philippines	2016.09.22	KY774608	Philippines	H22	Ferrer et al. 2019
Gracilaria salicornia	KGS1	Kapatan, Glan, Sarangani, Philippines	2016.08.04	KY774587	Philippines	H27	Ferrer et al. 2019
Gracilaria salicornia	KAS1	Kawas, Alabel, Sarangani, Philippines	2016.08.05	KY774586	Philippines	H27	Ferrer et al. 2019
Gracilaria salicornia	KVS1	Kayvaluganan, Uyugan, Batanes, Philippines	2016.04.13	KY774623	Philippines	H2	Ferrer et al. 2019
Gracilaria salicornia	G421	Lazi, Siquijor, Philippines	2010.04.29	JN790208	Philippines	H22	Yang et al. 2013
Gracilaria salicornia	LBS1	Lucero, Bolinao, Pangasinan, Philippines	2016.05.13	KY774588	Philippines	H27	Ferrer et al. 2019
Gracilaria salicornia	LBS2	Lucero, Bolinao, Pangasinan, Philippines	2016.05.13	KY774589	Philippines	H27	Ferrer et al. 2019
Gracilaria salicornia	LLS3	Lumaniag, Lian, Batangas, Philippines	2015.10.29	KY774624	Philippines	H2	Ferrer et al. 2019
Gracilaria salicornia	CLS1	Lumaniag, Lian, Batangas, Philippines	2015.10.29	KY774603	Philippines	H22	Ferrer et al. 2019
Gracilaria salicornia	LLS1	Lumaniag, Lian, Batangas, Philippines	2015.10.29	KY774590	Philippines	H27	Ferrer et al. 2019
Gracilaria salicornia	LLS2	Lumaniag, Lian, Batangas, Philippines	2015.10.29	KY774591	Philippines	H27	Ferrer et al. 2019
Gracilaria salicornia	LLS4	Lumaniag, Lian, Batangas, Philippines	2015.10.29	KY774592	Philippines	H27	Ferrer et al. 2019
Gracilaria salicornia	LLS5	Lumaniag, Lian, Batangas, Philippines	2015.10.29	KY774593	Philippines	H27	Ferrer et al. 2019
Gracilaria salicornia	MTS1	Mabua, Tandag, Surigao del Sur, Philippines	2016.06.03	KY774597	Philippines	H27	Ferrer et al. 2019
Gracilaria salicornia	G408	Milagros, Masbate, Philippines	2010.09.05	JN790215	Philippines	H22	Yang et al. 2013
Gracilaria salicornia	MIS1	MoroIsland, Isabela City, Basilan, Philippines	2016.08.25	KY774594	Philippines	H27	Ferrer et al. 2019
Gracilaria salicornia	MIS2	MoroIsland, Isabela City, Basilan, Philippines	2016.08.25	KY774595	Philippines	H27	Ferrer et al. 2019
Gracilaria salicornia	MIS3	MoroIsland, Isabela City, Basilan, Philippines	2016.08.25	KY774596	Philippines	H27	Ferrer et al. 2019
Gracilaria salicornia	NLS1	Nalvo Sur, Luna, Launion, Philippines	2015.03.18	KT357379	Philippines	H27	Ferrer et al. 2019
Gracilaria salicornia	PBS1	Paraoir, Balaoan, La Union, Philippines	2015.03.17	KT357377	Philippines	H4	Ferrer et al. 2019
Gracilaria salicornia	PBS2	Paraoir, Balaoan, La Union, Philippines	2015.03.17	KT357378	Philippines	H4	Ferrer et al. 2019
Gracilaria salicornia	PNS2	Pinamukan, New Washington, Aklan, Philippines	2015.12.02	KY774611	Philippines	H22	Ferrer et al. 2019
Gracilaria salicornia	PNS1	Pinamukan, New Washington, Aklan, Philippines	2015.12.02	KY774619	Philippines	H23	Ferrer et al. 2019
Gracilaria salicornia	P2CS2	Poblacion 2, Calatagan, Batangas, Philippines	2015.10.30	KY774625	Philippines	H2	Ferrer et al. 2019
Gracilaria salicornia	P2CS1	Poblacion 2, Calatagan, Batangas, Philippines	2015.10.30	KY774610	Philippines	H22	Ferrer et al. 2019
Gracilaria salicornia	A20H	Prieto Diaz, Sorsogon, Philippines	2015.02.04	MH028768	Philippines	H22	Ng et al. unpublished.
Gracilaria salicornia	A21H	Prieto Diaz, Sorsogon, Philippines	2015.02.04	MH028769	Philippines	H22	Ng et al. unpublished.
Gracilaria salicornia	G420	Rizal Beach, Gubat Bay, Sorsogon, Philippines	2010.02.02	JN790209	Philippines	H22	Yang et al. 2013
Gracilaria salicornia	G089	Rizal Beach, Gubat Bay, Sorsogon, Philippines	2010.02.02	JN790238	Philippines	H22	Yang et al. 2013
Gracilaria salicornia	G399	Sabang, Palawan, Philippines	2010.09.28	JN790199	Philippines	H27	Yang et al. 2013
Gracilaria salicornia	LTS1	San Lorenzo, Tabaco, Albay, Philippines	2016.09.22	KY774609	Philippines	H22	Ferrer et al. 2019
Gracilaria salicornia	G358	SanFranscsco, Camotes, Philippines	2010.04.04	JN790202	Philippines	H22	Yang et al. 2013
Gracilaria salicornia	G425	Sangali Bay, Zamboanga, Philippines	2010.04.10	JN790206	Philippines	H27	Yang et al. 2013
Gracilaria salicornia	G404	Sangali Bay, Zamboanga, Philippines	2010.04.10	JN790197	Philippines	H27	Yang et al. 2013
Gracilaria salicornia	G412	Sangali Bay, Zamboanga, Philippines	2010.04.10	JN790214	Philippines	H27	Yang et al. 2013
Gracilaria salicornia	SGS1	Sapao, Guiuan, Eastern Samar, Philippines	2015.05.21	KY774612	Philippines	H22	Ferrer et al. 2019
Gracilaria salicornia	SNS1	Sinakan, Sabtang, Batanes, Philippines	2016.04.14	KY774622	Philippines	H1	Ferrer et al. 2019
Gracilaria salicornia	PH029	Sulpa Island, Cebu, Philippines	2010.06.24	JN790191	Philippines	H27	Yang et al. 2013
Gracilaria salicornia	CGS1	Sur Campangihon, Guiuan, Eastern Samar, Philippines	2015.05.21	KY774601	Philippines	H22	Ferrer et al. 2019
Gracilaria salicornia	CGS2	Sur Campangihon, Guiuan, Eastern Samar, Philippines	2015.05.21	KY774602	Philippines	H22	Ferrer et al. 2019
Gracilaria salicornia	G398	Surigao, Philippines	2010.09.07	JN790218	Philippines	H22	Yang et al. 2013
Gracilaria salicornia	TGS1	Taluya, Glan, Sarangani, Philippines	2016.08.04	KY774598	Philippines	H27	Ferrer et al. 2019
Gracilaria salicornia	TUS1	Tapon, Ubay, Bohol, Philippines	2015.06.06	KY774613	Philippines	H22	Ferrer et al. 2019
Gracilaria salicornia	THS1	Tuhel, Ivana, Batanes, Philippines	2016.04.13	KY774621	Philippines	H25	Ferrer et al. 2019
Gracilaria salicornia	UCS1	Uba, Cortes, Surigao del Sur, Philippines	2016.06.03	KY774617	Philippines	H22	Ferrer et al. 2019
Gracilaria salicornia	UBS1	Uno, Bacacay, Albay, Philippines	2016.09.23	KY774614	Philippines	H22	Ferrer et al. 2019
Gracilaria salicornia	UBS2	Uno, Bacacay, Albay, Philippines	2016.09.23	KY774615	Philippines	H22	Ferrer et al. 2019
Gracilaria salicornia	UBS3	Uno, Bacacay, Albay, Philippines	2016.09.23	KY774616	Philippines	H22	Ferrer et al. 2019
Gracilaria salicornia	JS 3238	Changi, Singapore	2012.10.28	KF831097	Singapore	H1	Ng et al. 2015b
Gracilaria salicornia	JS 3275	Ketam Island, Singapore	2012.10.29	KF831098	Singapore	H1	Ng et al. 2015a
Gracilaria salicornia	JS 3346	OBS Camp 1, Ubin Island, Singapore	2012.10.26	KP010043	Singapore	H1	Ng et al. 2015a
Gracilaria salicornia	JS 3172	OBS Camp 1, Ubin Island, Singapore	2012.10.29	KF831096	Singapore	H1	Ng et al. 2015a
Gracilaria salicornia	JS 3274	OBS Camp 1, Ubin Island, Singapore	2012.10.29	KF831099	Singapore	H1	Ng et al. 2015a
Gracilaria salicornia	#FG134	Sungai Buloh Mangrove, Singapore	2000.02.10	MZ336093	Singapore	H3	Lyra et al. 2021
Gracilaria salicornia	-	Ao Cho, Trad, Thailand	2017.05	OQ831716	Thailand	H1	Muangmai et al. 2023
Gracilaria salicornia	-	Ao Cho, Trad, Thailand	2017.05	OQ831716	Thailand	H1	Muangmai et al. 2023
Gracilaria salicornia	-	Ao Cho, Trad, Thailand	2017.05	OQ831716	Thailand	H1	Muangmai et al. 2023
Gracilaria salicornia	-	Ao Cho, Trad, Thailand	2017.05	OQ831716	Thailand	H1	Muangmai et al. 2023
Gracilaria salicornia	-	Ao Cho, Trad, Thailand	2017.05	OQ831716	Thailand	H1	Muangmai et al. 2023
Gracilaria salicornia	-	Ao Cho, Trad, Thailand	2017.05	OQ831716	Thailand	H1	Muangmai et al. 2023
Gracilaria salicornia	-	Ao Cho, Trad, Thailand	2017.05	OQ831716	Thailand	H1	Muangmai et al. 2023
Gracilaria salicornia	-	Ao Cho, Trad, Thailand	2017.05	OQ831716	Thailand	H1	Muangmai et al. 2023
Gracilaria salicornia	-	Ao Cho, Trad, Thailand	2017.05	OQ831716	Thailand	H1	Muangmai et al. 2023
Gracilaria salicornia	-	Ao Cho, Trad, Thailand	2017.05	OQ831716	Thailand	H1	Muangmai et al. 2023
Gracilaria salicornia	-	Ao Cho, Trad, Thailand	2017.05	OQ831716	Thailand	H1	Muangmai et al. 2023
Gracilaria salicornia	-	Bang Ben Beach, Ranong, Thailand	2017.01	OQ831718	Thailand	H1	Muangmai et al. 2023
Gracilaria salicornia	-	Bang Ben Beach, Ranong, Thailand	2017.01	OQ831718	Thailand	H1	Muangmai et al. 2023
Gracilaria salicornia	-	Bang Ben Beach, Ranong, Thailand	2017.01	OQ831718	Thailand	H1	Muangmai et al. 2023
Gracilaria salicornia	-	Bang Ben Beach, Ranong, Thailand	2017.01	OQ831718	Thailand	H1	Muangmai et al. 2023
Gracilaria salicornia	-	Bang Ben Beach, Ranong, Thailand	2017.01	OQ831718	Thailand	H1	Muangmai et al. 2023
Gracilaria salicornia	-	Bang Ben Beach, Ranong, Thailand	2017.01	OQ831717	Thailand	H13	Muangmai et al. 2023
Gracilaria salicornia	-	Bang Ben Beach, Ranong, Thailand	2017.01	OQ831717	Thailand	H13	Muangmai et al. 2023
Gracilaria salicornia	-	Bang Ben Beach, Ranong, Thailand	2017.01	OQ831717	Thailand	H13	Muangmai et al. 2023
Gracilaria salicornia	-	Bang Ben Beach, Ranong, Thailand	2017.01	OQ831717	Thailand	H13	Muangmai et al. 2023
Gracilaria salicornia	-	Bang Ben Beach, Ranong, Thailand	2017.01	OQ831717	Thailand	H13	Muangmai et al. 2023
Gracilaria salicornia	-	Bang Ben Beach, Ranong, Thailand	2017.01	OQ831717	Thailand	H13	Muangmai et al. 2023
Gracilaria salicornia	-	Bang Ben Beach, Ranong, Thailand	2017.01	OQ831717	Thailand	H13	Muangmai et al. 2023
Gracilaria salicornia	-	Hat Ao Koei, Phang-Nga, Thailand	2017.01	OQ831717	Thailand	H13	Muangmai et al. 2023
Gracilaria salicornia	-	Hat Ao Koei, Phang-Nga, Thailand	2017.01	OQ831717	Thailand	H13	Muangmai et al. 2023
Gracilaria salicornia	-	Hat Ao Koei, Phang-Nga, Thailand	2017.01	OQ831717	Thailand	H13	Muangmai et al. 2023
Gracilaria salicornia	-	Hat Ao Koei, Phang-Nga, Thailand	2017.01	OQ831717	Thailand	H13	Muangmai et al. 2023
Gracilaria salicornia	-	Hat Ao Koei, Phang-Nga, Thailand	2017.01	OQ831717	Thailand	H13	Muangmai et al. 2023
Gracilaria salicornia	-	Hat Ao Koei, Phang-Nga, Thailand	2017.01	OQ831717	Thailand	H13	Muangmai et al. 2023
Gracilaria salicornia	-	Hat Ao Koei, Phang-Nga, Thailand	2017.01	OQ831717	Thailand	H13	Muangmai et al. 2023
Gracilaria salicornia	-	Hat Ao Koei, Phang-Nga, Thailand	2017.01	OQ831721	Thailand	H16	Muangmai et al. 2023
Gracilaria salicornia	-	Hat Ao Koei, Phang-Nga, Thailand	2017.01	OQ831721	Thailand	H16	Muangmai et al. 2023
Gracilaria salicornia	-	Hat Ao Koei, Phang-Nga, Thailand	2017.01	OQ831721	Thailand	H16	Muangmai et al. 2023
Gracilaria salicornia	-	Hat Ao Koei, Phang-Nga, Thailand	2017.01	OQ831721	Thailand	H16	Muangmai et al. 2023
Gracilaria salicornia	-	Hat Ao Koei, Phang-Nga, Thailand	2017.01	OQ831721	Thailand	H16	Muangmai et al. 2023
Gracilaria salicornia	-	Hat Ratcha Mongkhon, Trang, Thailand	2017.04	OQ831717	Thailand	H13	Muangmai et al. 2023
Gracilaria salicornia	-	Hat Ratcha Mongkhon, Trang, Thailand	2017.04	OQ831717	Thailand	H13	Muangmai et al. 2023
Gracilaria salicornia	-	Hat Ratcha Mongkhon, Trang, Thailand	2017.04	OQ831717	Thailand	H13	Muangmai et al. 2023
Gracilaria salicornia	-	Hat Ratcha Mongkhon, Trang, Thailand	2017.04	OQ831717	Thailand	H13	Muangmai et al. 2023
Gracilaria salicornia	-	Hat Ratcha Mongkhon, Trang, Thailand	2017.04	OQ831719	Thailand	H13	Muangmai et al. 2023
Gracilaria salicornia	-	Hat Ratcha Mongkhon, Trang, Thailand	2017.04	OQ831724	Thailand	H14	Muangmai et al. 2023
Gracilaria salicornia	-	Hat Ratcha Mongkhon, Trang, Thailand	2017.04	OQ831724	Thailand	H14	Muangmai et al. 2023
Gracilaria salicornia	-	Hat Ratcha Mongkhon, Trang, Thailand	2017.04	OQ831724	Thailand	H14	Muangmai et al. 2023
Gracilaria salicornia	-	Hat Ratcha Mongkhon, Trang, Thailand	2017.04	OQ831724	Thailand	H14	Muangmai et al. 2023
Gracilaria salicornia	-	Hat Ratcha Mongkhon, Trang, Thailand	2017.04	OQ831724	Thailand	H14	Muangmai et al. 2023
Gracilaria salicornia	-	Hat Ratcha Mongkhon, Trang, Thailand	2017.04	OQ831724	Thailand	H14	Muangmai et al. 2023
Gracilaria salicornia	-	Hat Ratcha Mongkhon, Trang, Thailand	2017.04	OQ831724	Thailand	H14	Muangmai et al. 2023
Gracilaria salicornia	-	Hat Ratcha Mongkhon, Trang, Thailand	2017.04	OQ831724	Thailand	H14	Muangmai et al. 2023
Gracilaria salicornia	-	Hat Ratcha Mongkhon, Trang, Thailand	2017.04	OQ831724	Thailand	H14	Muangmai et al. 2023
Gracilaria salicornia	-	Hat Ratcha Mongkhon, Trang, Thailand	2017.04	OQ831724	Thailand	H14	Muangmai et al. 2023
Gracilaria salicornia	-	Hin Hgam Beach, Nachon Si Thammarat, Thailand	2018.04	OQ831716	Thailand	H1	Muangmai et al. 2023
Gracilaria salicornia	-	Hin Hgam Beach, Nachon Si Thammarat, Thailand	2018.04	OQ831716	Thailand	H1	Muangmai et al. 2023
Gracilaria salicornia	-	Hin Hgam Beach, Nachon Si Thammarat, Thailand	2018.04	OQ831716	Thailand	H1	Muangmai et al. 2023
Gracilaria salicornia	-	Hin Hgam Beach, Nachon Si Thammarat, Thailand	2018.04	OQ831716	Thailand	H1	Muangmai et al. 2023
Gracilaria salicornia	-	Hin Hgam Beach, Nachon Si Thammarat, Thailand	2018.04	OQ831716	Thailand	H1	Muangmai et al. 2023
Gracilaria salicornia	-	Hin Hgam Beach, Nachon Si Thammarat, Thailand	2018.04	OQ831716	Thailand	H1	Muangmai et al. 2023
Gracilaria salicornia	-	Hin Hgam Beach, Nachon Si Thammarat, Thailand	2018.04	OQ831716	Thailand	H1	Muangmai et al. 2023
Gracilaria salicornia	-	Hin Hgam Beach, Nachon Si Thammarat, Thailand	2018.04	OQ831716	Thailand	H1	Muangmai et al. 2023
Gracilaria salicornia	-	Hin Hgam Beach, Nachon Si Thammarat, Thailand	2018.04	OQ831716	Thailand	H1	Muangmai et al. 2023
Gracilaria salicornia	-	Hin Hgam Beach, Nachon Si Thammarat, Thailand	2018.04	OQ831716	Thailand	H1	Muangmai et al. 2023
Gracilaria salicornia	-	Ko Kam Nui, Ranong, Thailand	2017.01	OQ831717	Thailand	H13	Muangmai et al. 2023
Gracilaria salicornia	-	Ko Kam Nui, Ranong, Thailand	2017.01	OQ831717	Thailand	H13	Muangmai et al. 2023
Gracilaria salicornia	-	Ko Kam Nui, Ranong, Thailand	2017.01	OQ831717	Thailand	H13	Muangmai et al. 2023
Gracilaria salicornia	-	Ko Kam Nui, Ranong, Thailand	2017.01	OQ831717	Thailand	H13	Muangmai et al. 2023
Gracilaria salicornia	-	Ko Kam Nui, Ranong, Thailand	2017.01	OQ831717	Thailand	H13	Muangmai et al. 2023
Gracilaria salicornia	-	Ko Kam Nui, Ranong, Thailand	2017.01	OQ831717	Thailand	H13	Muangmai et al. 2023
Gracilaria salicornia	-	Ko Kam Nui, Ranong, Thailand	2017.01	OQ831717	Thailand	H13	Muangmai et al. 2023
Gracilaria salicornia	-	Ko Kam Nui, Ranong, Thailand	2017.01	OQ831717	Thailand	H13	Muangmai et al. 2023
Gracilaria salicornia	-	Ko Kam Nui, Ranong, Thailand	2017.01	OQ831722	Thailand	H17	Muangmai et al. 2023
Gracilaria salicornia	-	Ko Kam Nui, Ranong, Thailand	2017.01	OQ831722	Thailand	H17	Muangmai et al. 2023
Gracilaria salicornia	-	Ko Kam Nui, Ranong, Thailand	2017.01	OQ831722	Thailand	H17	Muangmai et al. 2023
Gracilaria salicornia	-	Ko Kam Nui, Ranong, Thailand	2017.01	OQ831722	Thailand	H17	Muangmai et al. 2023
Gracilaria salicornia	-	Ko Libong, Trang, Thailand	2017.04	OQ831717	Thailand	H13	Muangmai et al. 2023
Gracilaria salicornia	-	Ko Libong, Trang, Thailand	2017.04	OQ831723	Thailand	H14	Muangmai et al. 2023
Gracilaria salicornia	-	Ko Libong, Trang, Thailand	2017.04	OQ831723	Thailand	H14	Muangmai et al. 2023
Gracilaria salicornia	-	Ko Libong, Trang, Thailand	2017.04	OQ831723	Thailand	H14	Muangmai et al. 2023
Gracilaria salicornia	-	Ko Libong, Trang, Thailand	2017.04	OQ831723	Thailand	H14	Muangmai et al. 2023
Gracilaria salicornia	-	Ko Libong, Trang, Thailand	2017.04	OQ831724	Thailand	H14	Muangmai et al. 2023
Gracilaria salicornia	-	Ko Libong, Trang, Thailand	2017.04	OQ831724	Thailand	H14	Muangmai et al. 2023
Gracilaria salicornia	-	Ko Libong, Trang, Thailand	2017.04	OQ831724	Thailand	H14	Muangmai et al. 2023
Gracilaria salicornia	-	Ko Libong, Trang, Thailand	2017.04	OQ831724	Thailand	H14	Muangmai et al. 2023
Gracilaria salicornia	-	Ko Libong, Trang, Thailand	2017.04	OQ831724	Thailand	H14	Muangmai et al. 2023
Gracilaria salicornia	-	Ko Phaluai, Surat Thani, Thailand	2018.04	OQ831716	Thailand	H1	Muangmai et al. 2023
Gracilaria salicornia	-	Ko Phaluai, Surat Thani, Thailand	2018.04	OQ831716	Thailand	H1	Muangmai et al. 2023
Gracilaria salicornia	-	Ko Phaluai, Surat Thani, Thailand	2018.04	OQ831716	Thailand	H1	Muangmai et al. 2023
Gracilaria salicornia	-	Ko Phaluai, Surat Thani, Thailand	2018.04	OQ831716	Thailand	H1	Muangmai et al. 2023
Gracilaria salicornia	-	Ko Phaluai, Surat Thani, Thailand	2018.04	OQ831716	Thailand	H1	Muangmai et al. 2023
Gracilaria salicornia	-	Ko Phaluai, Surat Thani, Thailand	2018.04	OQ831716	Thailand	H1	Muangmai et al. 2023
Gracilaria salicornia	-	Ko Phaluai, Surat Thani, Thailand	2018.04	OQ831716	Thailand	H1	Muangmai et al. 2023
Gracilaria salicornia	-	Ko Phaluai, Surat Thani, Thailand	2018.04	OQ831716	Thailand	H1	Muangmai et al. 2023
Gracilaria salicornia	-	Ko Phaluai, Surat Thani, Thailand	2018.04	OQ831718	Thailand	H1	Muangmai et al. 2023
Gracilaria salicornia	-	Ko Phaluai, Surat Thani, Thailand	2018.04	OQ831718	Thailand	H1	Muangmai et al. 2023
Gracilaria salicornia	-	Ko Phaluai, Surat Thani, Thailand	2018.04	OQ831718	Thailand	H1	Muangmai et al. 2023
Gracilaria salicornia	-	Ko Phaluai, Surat Thani, Thailand	2018.04	OQ831718	Thailand	H1	Muangmai et al. 2023
Gracilaria salicornia	-	Laem Kho Kwang Beach, Ko Lanta, Krabi, Thailand	2017.04	OQ831717	Thailand	H13	Muangmai et al. 2023
Gracilaria salicornia	-	Laem Kho Kwang Beach, Ko Lanta, Krabi, Thailand	2017.04	OQ831717	Thailand	H13	Muangmai et al. 2023
Gracilaria salicornia	-	Laem Kho Kwang Beach, Ko Lanta, Krabi, Thailand	2017.04	OQ831717	Thailand	H13	Muangmai et al. 2023
Gracilaria salicornia	-	Laem Kho Kwang Beach, Ko Lanta, Krabi, Thailand	2017.04	OQ831717	Thailand	H13	Muangmai et al. 2023
Gracilaria salicornia	-	Laem Kho Kwang Beach, Ko Lanta, Krabi, Thailand	2017.04	OQ831717	Thailand	H13	Muangmai et al. 2023
Gracilaria salicornia	-	Laem Kho Kwang Beach, Ko Lanta, Krabi, Thailand	2017.04	OQ831717	Thailand	H13	Muangmai et al. 2023
Gracilaria salicornia	-	Laem Kho Kwang Beach, Ko Lanta, Krabi, Thailand	2017.04	OQ831717	Thailand	H13	Muangmai et al. 2023
Gracilaria salicornia	-	Laem Kho Kwang Beach, Ko Lanta, Krabi, Thailand	2017.04	OQ831720	Thailand	H15	Muangmai et al. 2023
Gracilaria salicornia	-	Laem Kho Kwang Beach, Ko Lanta, Krabi, Thailand	2017.04	OQ831720	Thailand	H15	Muangmai et al. 2023
Gracilaria salicornia	-	Laem Kho Kwang Beach, Ko Lanta, Krabi, Thailand	2017.04	OQ831720	Thailand	H15	Muangmai et al. 2023
Gracilaria salicornia	-	Laem Kho Kwang Beach, Ko Lanta, Krabi, Thailand	2017.04	OQ831720	Thailand	H15	Muangmai et al. 2023
Gracilaria salicornia	-	Pak Bara Beach, Satun, Thailand	2017.05	OQ831717	Thailand	H13	Muangmai et al. 2023
Gracilaria salicornia	-	Pak Bara Beach, Satun, Thailand	2017.05	OQ831717	Thailand	H13	Muangmai et al. 2023
Gracilaria salicornia	-	Pak Bara Beach, Satun, Thailand	2017.05	OQ831717	Thailand	H13	Muangmai et al. 2023
Gracilaria salicornia	-	Pak Bara Beach, Satun, Thailand	2017.05	OQ831717	Thailand	H13	Muangmai et al. 2023
Gracilaria salicornia	-	Pak Bara Beach, Satun, Thailand	2017.05	OQ831717	Thailand	H13	Muangmai et al. 2023
Gracilaria salicornia	-	Pak Bara Beach, Satun, Thailand	2017.05	OQ831719	Thailand	H13	Muangmai et al. 2023
Gracilaria salicornia	-	Pak Bara Beach, Satun, Thailand	2017.05	OQ831719	Thailand	H13	Muangmai et al. 2023
Gracilaria salicornia	-	Pak Bara Beach, Satun, Thailand	2017.05	OQ831719	Thailand	H13	Muangmai et al. 2023
Gracilaria salicornia	-	Pak Bara Beach, Satun, Thailand	2017.05	OQ831719	Thailand	H13	Muangmai et al. 2023
Gracilaria salicornia	-	Pak Bara Beach, Satun, Thailand	2017.05	OQ831719	Thailand	H13	Muangmai et al. 2023
Gracilaria salicornia	-	Pak Bara Beach, Satun, Thailand	2017.05	OQ831719	Thailand	H13	Muangmai et al. 2023
Gracilaria salicornia	-	Pak Bara Beach, Satun, Thailand	2017.05	OQ831719	Thailand	H13	Muangmai et al. 2023
Gracilaria salicornia	G182	Phuket, Thailand	2008.05.05	JN790220	Thailand	H13	Yang et al. 2013
Gracilaria salicornia	G175	Phuket, Thailand	2008.05.05	JN790221	Thailand	H13	Yang et al. 2013
Gracilaria salicornia	G170	Phuket, Thailand	2008.05.04	JN790223	Thailand	H13	Yang et al. 2013
Gracilaria salicornia	G162	Phuket, Thailand	2008.05.05	JN790225	Thailand	H13	Yang et al. 2013
Gracilaria salicornia	G0606	Samae San, Chonburi, Thailand	2009.07.26	JN790235	Thailand	H1	Yang et al. 2013
Gracilaria salicornia	-	Samaesan, Chon Buri, Thailand	2017.03	OQ831716	Thailand	H1	Muangmai et al. 2023
Gracilaria salicornia	-	Samaesan, Chon Buri, Thailand	2017.03	OQ831716	Thailand	H1	Muangmai et al. 2023
Gracilaria salicornia	-	Samaesan, Chon Buri, Thailand	2017.03	OQ831716	Thailand	H1	Muangmai et al. 2023
Gracilaria salicornia	-	Samaesan, Chon Buri, Thailand	2017.03	OQ831716	Thailand	H1	Muangmai et al. 2023
Gracilaria salicornia	-	Samaesan, Chon Buri, Thailand	2017.03	OQ831716	Thailand	H1	Muangmai et al. 2023
Gracilaria salicornia	-	Samaesan, Chon Buri, Thailand	2017.03	OQ831716	Thailand	H1	Muangmai et al. 2023
Gracilaria salicornia	-	Samaesan, Chon Buri, Thailand	2017.03	OQ831716	Thailand	H1	Muangmai et al. 2023
Gracilaria salicornia	-	Samaesan, Chon Buri, Thailand	2017.03	OQ831716	Thailand	H1	Muangmai et al. 2023
Gracilaria salicornia	-	Samaesan, Chon Buri, Thailand	2017.03	OQ831716	Thailand	H1	Muangmai et al. 2023
Gracilaria salicornia	-	Samaesan, Chon Buri, Thailand	2017.03	OQ831716	Thailand	H1	Muangmai et al. 2023
Gracilaria salicornia	PSM 12789_UMSS 0705	Samaesan, Chonburi, Thailand	2013.03.16	MH028763	Thailand	H1	Ng et al. unpublished.
Gracilaria salicornia	PSM 12789_UMSS 0705	Samaesan, Chonburi, Thailand	2013.03.16	MH028764	Thailand	H1	Ng et al. unpublished.
Gracilaria salicornia	-	Surin Beach, Phuket, Thailand	2017.02	OQ831717	Thailand	H13	Muangmai et al. 2023
Gracilaria salicornia	-	Surin Beach, Phuket, Thailand	2017.02	OQ831717	Thailand	H13	Muangmai et al. 2023
Gracilaria salicornia	-	Surin Beach, Phuket, Thailand	2017.02	OQ831722	Thailand	H17	Muangmai et al. 2023
Gracilaria salicornia	-	Surin Beach, Phuket, Thailand	2017.02	OQ831722	Thailand	H17	Muangmai et al. 2023
Gracilaria salicornia	-	Surin Beach, Phuket, Thailand	2017.02	OQ831722	Thailand	H17	Muangmai et al. 2023
Gracilaria salicornia	-	Surin Beach, Phuket, Thailand	2017.02	OQ831722	Thailand	H17	Muangmai et al. 2023
Gracilaria salicornia	-	Surin Beach, Phuket, Thailand	2017.02	OQ831722	Thailand	H17	Muangmai et al. 2023
Gracilaria salicornia	-	Surin Beach, Phuket, Thailand	2017.02	OQ831722	Thailand	H17	Muangmai et al. 2023
Gracilaria salicornia	-	Surin Beach, Phuket, Thailand	2017.02	OQ831722	Thailand	H17	Muangmai et al. 2023
Gracilaria salicornia	-	Surin Beach, Phuket, Thailand	2017.02	OQ831722	Thailand	H17	Muangmai et al. 2023
Gracilaria salicornia	-	Ta Mong Lai, Prachuap Khiri Khan, Thailand	2018.03	OQ831716	Thailand	H1	Muangmai et al. 2023
Gracilaria salicornia	-	Ta Mong Lai, Prachuap Khiri Khan, Thailand	2018.03	OQ831716	Thailand	H1	Muangmai et al. 2023
Gracilaria salicornia	-	Ta Mong Lai, Prachuap Khiri Khan, Thailand	2018.03	OQ831716	Thailand	H1	Muangmai et al. 2023
Gracilaria salicornia	-	Ta Mong Lai, Prachuap Khiri Khan, Thailand	2018.03	OQ831716	Thailand	H1	Muangmai et al. 2023
Gracilaria salicornia	-	Ta Mong Lai, Prachuap Khiri Khan, Thailand	2018.03	OQ831716	Thailand	H1	Muangmai et al. 2023
Gracilaria salicornia	-	Ta Mong Lai, Prachuap Khiri Khan, Thailand	2018.03	OQ831716	Thailand	H1	Muangmai et al. 2023
Gracilaria salicornia	-	Ta Mong Lai, Prachuap Khiri Khan, Thailand	2018.03	OQ831716	Thailand	H1	Muangmai et al. 2023
Gracilaria salicornia	-	Ta Mong Lai, Prachuap Khiri Khan, Thailand	2018.03	OQ831716	Thailand	H1	Muangmai et al. 2023
Gracilaria salicornia	-	Ta Mong Lai, Prachuap Khiri Khan, Thailand	2018.03	OQ831716	Thailand	H1	Muangmai et al. 2023
Gracilaria salicornia	-	Ta Mong Lai, Prachuap Khiri Khan, Thailand	2018.03	OQ831716	Thailand	H1	Muangmai et al. 2023
Gracilaria salicornia	-	Ta Mong Lai, Prachuap Khiri Khan, Thailand	2018.03	OQ831716	Thailand	H1	Muangmai et al. 2023
Gracilaria salicornia	-	Ta Mong Lai, Prachuap Khiri Khan, Thailand	2018.03	OQ831716	Thailand	H1	Muangmai et al. 2023
Gracilaria salicornia	-	Thungwualaen Beach, Chumphon, Thailand	2018.04	OQ831716	Thailand	H1	Muangmai et al. 2023
Gracilaria salicornia	-	Thungwualaen Beach, Chumphon, Thailand	2018.04	OQ831716	Thailand	H1	Muangmai et al. 2023
Gracilaria salicornia	-	Thungwualaen Beach, Chumphon, Thailand	2018.04	OQ831716	Thailand	H1	Muangmai et al. 2023
Gracilaria salicornia	-	Thungwualaen Beach, Chumphon, Thailand	2018.04	OQ831716	Thailand	H1	Muangmai et al. 2023
Gracilaria salicornia	-	Thungwualaen Beach, Chumphon, Thailand	2018.04	OQ831716	Thailand	H1	Muangmai et al. 2023
Gracilaria salicornia	-	Thungwualaen Beach, Chumphon, Thailand	2018.04	OQ831716	Thailand	H1	Muangmai et al. 2023
Gracilaria salicornia	-	Thungwualaen Beach, Chumphon, Thailand	2018.04	OQ831716	Thailand	H1	Muangmai et al. 2023
Gracilaria salicornia	-	Thungwualaen Beach, Chumphon, Thailand	2018.04	OQ831716	Thailand	H1	Muangmai et al. 2023
Gracilaria salicornia	-	Thungwualaen Beach, Chumphon, Thailand	2018.04	OQ831716	Thailand	H1	Muangmai et al. 2023
Gracilaria salicornia	-	Thungwualaen Beach, Chumphon, Thailand	2018.04	OQ831716	Thailand	H1	Muangmai et al. 2023
Gracilaria salicornia	-	Thungwualaen Beach, Chumphon, Thailand	2018.04	OQ831716	Thailand	H1	Muangmai et al. 2023
Gracilaria salicornia	-	Wanakorn Beach, Prachuap Khiri Khan, Thailand	2018.03	OQ831716	Thailand	H1	Muangmai et al. 2023
Gracilaria salicornia	-	Wanakorn Beach, Prachuap Khiri Khan, Thailand	2018.03	OQ831716	Thailand	H1	Muangmai et al. 2023
Gracilaria salicornia	-	Wanakorn Beach, Prachuap Khiri Khan, Thailand	2018.03	OQ831716	Thailand	H1	Muangmai et al. 2023
Gracilaria salicornia	-	Wanakorn Beach, Prachuap Khiri Khan, Thailand	2018.03	OQ831716	Thailand	H1	Muangmai et al. 2023
Gracilaria salicornia	-	Wanakorn Beach, Prachuap Khiri Khan, Thailand	2018.03	OQ831716	Thailand	H1	Muangmai et al. 2023
Gracilaria salicornia	-	Wanakorn Beach, Prachuap Khiri Khan, Thailand	2018.03	OQ831716	Thailand	H1	Muangmai et al. 2023
Gracilaria salicornia	-	Wanakorn Beach, Prachuap Khiri Khan, Thailand	2018.03	OQ831716	Thailand	H1	Muangmai et al. 2023
Gracilaria salicornia	-	Wanakorn Beach, Prachuap Khiri Khan, Thailand	2018.03	OQ831716	Thailand	H1	Muangmai et al. 2023
Gracilaria salicornia	-	Wanakorn Beach, Prachuap Khiri Khan, Thailand	2018.03	OQ831716	Thailand	H1	Muangmai et al. 2023
Gracilaria salicornia	-	Wanakorn Beach, Prachuap Khiri Khan, Thailand	2018.03	OQ831716	Thailand	H1	Muangmai et al. 2023
Gracilaria salicornia	-	Wanakorn Beach, Prachuap Khiri Khan, Thailand	2018.03	OQ831716	Thailand	H1	Muangmai et al. 2023
Gracilaria salicornia	VHTKG005	Ha Tien, Kien Giang, Vietnam	2022.04.01	PQ900899	Vietnam	H1	This study
Gracilaria salicornia	VHTKG3040	Ha Tien, Kien Giang, Vietnam	2022.04.01	PQ900900	Vietnam	H1	This study
Gracilaria salicornia	VHTKG3041	Ha Tien, Kien Giang, Vietnam	2022.04.01	PQ900901	Vietnam	H1	This study
Gracilaria salicornia	VHTKG3120	Ha Tien, Kien Giang, Vietnam	2022.04.01	PQ900902	Vietnam	H8	This study
Gracilaria salicornia	VHTKG3135	Ha Tien, Kien Giang, Vietnam	2022.04.01	PQ900903	Vietnam	H1	This study
Gracilaria salicornia	VSH3433	Ham Thuan Nam, Ninh Thuan, Vietnam	2022.05.22	PQ900904	Vietnam	H1	This study
Gracilaria salicornia	VSH3438	Ham Thuan Nam, Ninh Thuan, Vietnam	2022.05.22	PQ900905	Vietnam	H1	This study
Gracilaria salicornia	VSH3443	Ham Thuan Nam, Ninh Thuan, Vietnam	2022.05.22	PQ900906	Vietnam	H1	This study
Gracilaria salicornia	VSH3449	Ham Thuan Nam, Ninh Thuan, Vietnam	2022.05.22	PQ900907	Vietnam	H1	This study
Gracilaria salicornia	VSH3450	Ham Thuan Nam, Ninh Thuan, Vietnam	2022.05.22	PQ900908	Vietnam	H1	This study
Gracilaria salicornia	VLS3534	Ly Son island, Quang Ngai, Vietnam	2022.06.14	PQ900909	Vietnam	H1	This study
Gracilaria salicornia	VLS3535	Ly Son island, Quang Ngai, Vietnam	2022.06.14	PQ900910	Vietnam	H1	This study
Gracilaria salicornia	VLS3537	Ly Son island, Quang Ngai, Vietnam	2022.06.14	PQ900911	Vietnam	H1	This study
Gracilaria salicornia	VLS3538	Ly Son island, Quang Ngai, Vietnam	2022.06.14	PQ900912	Vietnam	H1	This study
Gracilaria salicornia	VLS3539	Ly Son island, Quang Ngai, Vietnam	2022.06.14	PQ900913	Vietnam	H1	This study
Gracilaria salicornia	VNC1	Ninh Hai, Ninh Thuan, Vietnam	2023.12.06	PQ900914	Vietnam	H1	This study
Gracilaria salicornia	VNC2	Ninh Hai, Ninh Thuan, Vietnam	2023.12.06	PQ900915	Vietnam	H1	This study
Gracilaria salicornia	VNC4	Ninh Hai, Ninh Thuan, Vietnam	2023.12.06	PQ900916	Vietnam	H1	This study
Gracilaria salicornia	VNC5	Ninh Hai, Ninh Thuan, Vietnam	2023.12.06	PQ900917	Vietnam	H1	This study
Gracilaria salicornia	VNC6	Ninh Hai, Ninh Thuan, Vietnam	2023.12.06	PQ900918	Vietnam	H1	This study
Gracilaria salicornia	VNC7	Ninh Hai, Ninh Thuan, Vietnam	2023.12.06	PQ900919	Vietnam	H1	This study
Gracilaria salicornia	VNC8	Ninh Hai, Ninh Thuan, Vietnam	2023.12.06	PQ900920	Vietnam	H1	This study
Gracilaria salicornia	VNC9	Ninh Hai, Ninh Thuan, Vietnam	2023.12.06	PQ900921	Vietnam	H1	This study
Gracilaria salicornia	VNC10	Ninh Hai, Ninh Thuan, Vietnam	2023.12.06	PQ900922	Vietnam	H1	This study
Gracilaria salicornia	VNC13	Ninh Hai, Ninh Thuan, Vietnam	2023.12.06	PQ900923	Vietnam	H1	This study
Gracilaria salicornia	VNC14	Ninh Hai, Ninh Thuan, Vietnam	2023.12.06	PQ900924	Vietnam	H1	This study
Gracilaria salicornia	VNC15	Ninh Hai, Ninh Thuan, Vietnam	2023.12.06	PQ900925	Vietnam	H1	This study
Gracilaria salicornia	VNC16	Ninh Hai, Ninh Thuan, Vietnam	2023.12.06	PQ900926	Vietnam	H1	This study
Gracilaria salicornia	VNC21	Ninh Hai, Ninh Thuan, Vietnam	2023.12.06	PQ900927	Vietnam	H1	This study
Gracilaria salicornia	VNC22	Ninh Hai, Ninh Thuan, Vietnam	2023.12.06	PQ900928	Vietnam	H1	This study
Gracilaria salicornia	VNC26	Ninh Hai, Ninh Thuan, Vietnam	2023.12.06	PQ900929	Vietnam	H1	This study
Gracilaria salicornia	VNH1	Ninh Hoa, Khanh Hoa, Vietnam	2023.12.07	PQ900930	Vietnam	H1	This study
Gracilaria salicornia	VNH2	Ninh Hoa, Khanh Hoa, Vietnam	2023.12.07	PQ900931	Vietnam	H1	This study
Gracilaria salicornia	VNH3	Ninh Hoa, Khanh Hoa, Vietnam	2023.12.07	PQ900932	Vietnam	H4	This study
Gracilaria salicornia	VNH5	Ninh Hoa, Khanh Hoa, Vietnam	2023.12.07	PQ900933	Vietnam	H4	This study
Gracilaria salicornia	VNH6	Ninh Hoa, Khanh Hoa, Vietnam	2023.12.07	PQ900934	Vietnam	H4	This study
Gracilaria salicornia	VNH8	Ninh Hoa, Khanh Hoa, Vietnam	2023.12.07	PQ900935	Vietnam	H4	This study
Gracilaria salicornia	VNH9	Ninh Hoa, Khanh Hoa, Vietnam	2023.12.07	PQ900936	Vietnam	H7	This study
Gracilaria salicornia	VNH12	Ninh Hoa, Khanh Hoa, Vietnam	2023.12.07	PQ900937	Vietnam	H4	This study
Gracilaria salicornia	VNH13	Ninh Hoa, Khanh Hoa, Vietnam	2023.12.07	PQ900938	Vietnam	H4	This study
Gracilaria salicornia	VNH14	Ninh Hoa, Khanh Hoa, Vietnam	2023.12.07	PQ900939	Vietnam	H7	This study
Gracilaria salicornia	VNT3628	Nui Thanh, Quang Nam, Vietnam	2022.06.16	PQ900940	Vietnam	H1	This study
Gracilaria salicornia	VNT3634	Nui Thanh, Quang Nam, Vietnam	2022.06.16	PQ900941	Vietnam	H6	This study
Gracilaria salicornia	VNT3636	Nui Thanh, Quang Nam, Vietnam	2022.06.16	PQ900942	Vietnam	H1	This study
Gracilaria salicornia	VNT3638	Nui Thanh, Quang Nam, Vietnam	2022.06.16	PQ900943	Vietnam	H1	This study
Gracilaria salicornia	VNT3639	Nui Thanh, Quang Nam, Vietnam	2022.06.16	PQ900944	Vietnam	H1	This study
Gracilaria salicornia	VNT3641	Nui Thanh, Quang Nam, Vietnam	2022.06.16	PQ900945	Vietnam	H6	This study
Gracilaria salicornia	VNT3643	Nui Thanh, Quang Nam, Vietnam	2022.06.16	PQ900946	Vietnam	H1	This study
Gracilaria salicornia	VNT3649	Nui Thanh, Quang Nam, Vietnam	2022.06.16	PQ900947	Vietnam	H1	This study
Gracilaria salicornia	VNT3650	Nui Thanh, Quang Nam, Vietnam	2022.06.16	PQ900948	Vietnam	H1	This study
Gracilaria salicornia	VPQBT3677	Phu Quy island, Binh Thuan, Vietnam	2022.06.20	PQ900949	Vietnam	H1	This study
Gracilaria salicornia	VPQBT3679	Phu Quy island, Binh Thuan, Vietnam	2022.06.20	PQ900950	Vietnam	H1	This study
Gracilaria salicornia	VPQBT3680	Phu Quy island, Binh Thuan, Vietnam	2022.06.20	PQ900951	Vietnam	H1	This study
Gracilaria salicornia	VPQBT3681	Phu Quy island, Binh Thuan, Vietnam	2022.06.20	PQ900952	Vietnam	H1	This study
Gracilaria salicornia	VPQBT3688	Phu Quy island, Binh Thuan, Vietnam	2022.06.20	PQ900953	Vietnam	H1	This study
